# Supplementary material for: Effect of DLK1 and RTL1 but Not MEG3 or MEG8 on Muscle Gene Expression in Callipyge Lambs
Source: PLoS One. 2009 Oct 9;4(10):e7399. doi: 10.1371/journal.pone.0007399 (PMC2756960; doi:10.1371/journal.pone.0007399)
Supplement: Table S1 — Affymetrix Probe Sets and Annotations with Significant Genotype and Age Effects FDR<0.10 (0.12 MB DOC) [file pone.0007399.s001.xls]

## Sheet: Supplementary File 1
	Genotype	Entrez	Gene		Unigene	Rep	RefSeq
Probe Set ID	FDR	Gene ID	Symbol	Gene Title	ID	Public ID	Transcript ID
Genotype
Bt.20446.1.A1_at	0.001	539556	PDE4D	cAMP specific phosphodiesterase 4D	30094	CB460922	NM_001104631
Bt.21745.1.S1_at	0.001	511268	PARK7	Parkinson disease (autosomal recessive, early onset) 7	21745	CK972818	NM_001015572
Bt.26158.1.A1_at	0.001	534180	KCNN3	potassium intermediate/small conductance calcium-activated channel, family N3	37311	CK775267	XM_868686
Bt.5223.1.S1_at	0.0014	281117	DLK1	delta-like 1 homolog (Drosophila)	5223	NM_174037.2	NM_174037
Bt.8972.1.S1_at	0.0014	505524	DNTTIP1	deoxynucleotidyltransferase, terminal, interacting protein 1	8972	CK775559	NM_001098876
Bt.20281.3.S1_a_at	0.0026	534402	PGM1	phosphoglucomutase 1	59999	BE808500	NM_001076903
Bt.12510.1.S1_at	0.0038	509824	MEG3	maternal expressed gene 3, GTL2 variant D	---	CB464112	---
Bt.17613.1.A1_at	0.0038	CB455735	---	transcribed sequence	97114	CB455735	---
Bt.11029.1.S1_at	0.0046	616838	CCDC8	Coiled-coil domain containing 8	11029	CK846178	NM_001035485
Bt.12327.1.S1_at	0.0046	506790	TXNIP	thioredoxin interacting protein	12327	CK849102	NM_001101875
Bt.1358.1.S1_at	0.0046	614675	PDLIM1	PDZ and LIM domain 1	32810	CK771210	NM_001035455
Bt.4718.1.S1_at	0.0046	317656	PCTP	phosphatidylcholine transfer protein	4718	NM_174835.2	NM_174835
Bt.5387.1.S1_at	0.0046	280843	LPL	lipoprotein lipase	5387	BG688620	NM_001075120
Bt.2266.1.A1_at	0.0064	505371	TRAF3IP3	TRAF3 interacting protein 3	48370	CK957909	NM_001024476 /// NM_001113245
Bt.1953.1.S1_at	0.0071	515593	MAP1A	microtubule-associated protein 1A	43028	CK773867	XM_593636
Bt.23497.1.S1_at	0.0071	618352	MYL3	myosin, light chain 3, alkali; ventricular, skeletal, slow	23497	CK772545	XM_001790500
Bt.4738.1.S1_at	0.0076	281039	CAST	calpastatin	4738	L14450.1	NM_001030318 /// NM_001030319 /// NM_001030320 /// NM_174003
Bt.19447.1.A1_at	0.0088	CB535183	---	transcribed sequence	89865	CB535183	---
Bt.20281.2.S1_a_at	0.0088	534402	PGM1	phosphoglucomutase 1	59999	CB463799	NM_001076903
Bt.12300.2.S1_at	0.009	281337	MYH1	myosin, heavy chain 1, skeletal muscle, adult	91663	AB059398.1	NM_174117
Bt.14371.1.A1_at	0.0099	CK968244	SLC22A3	similar to solute carrier family 22 member 3	14371	CK968244	---
Bt.22379.1.S1_at	0.0099	536925	CABC1	chaperone, ABC1 activity of bc1 complex homolog (S. pombe)	22379	CK849139	NM_001046419
Bt.22536.2.S1_at	0.0099	613522	KCMF1	potassium channel modulatory factor 1	22536	AV613194	NM_001076275
Bt.26750.1.S1_at	0.0099	513822	LOC513822	hypothetical protein containing a methyltransferase domain	65066	BM254980	NM_001014922
Bt.4983.1.S1_at	0.0099	514335	ES1	es1 protein	59485	CB166394	NM_001034463
Bt.5161.1.S1_at	0.0099	532257	LOC532257	similar to ubiquitin specific protease 24	---	CK951722	XR_027694
Bt.1035.1.S1_a_at	0.0105	338062	FCGRT	Fc fragment of IgG, receptor, transporter, alpha	1035	BG948848	NM_176657
Bt.3005.1.S1_at	0.0115	281275	LDHB	lactate dehydrogenase B	7736	CK953000	NM_174100
Bt.17102.2.S1_at	0.0144	532726	PPP1R2	Protein phosphatase 1, regulatory (inhibitor) subunit 2	7968	BG358933	NM_001035392
Bt.9949.3.S1_a_at	0.0144	533851	PDLIM7	PDZ and LIM domain 7 (enigma)	9949	BF429926	NM_001017947 /// NM_001113251
Bt.12510.1.S1_a_at	0.0149	510465	CRTC1	CREB regulated transcription coactivator 1	44393	BC126489	XM_866768
Bt.13256.1.A1_at	0.0158	533403	PIAS2	protein inhibitor of activated STAT, 2	26753	CB461113	XM_612798
Bt.19420.2.S1_at	0.0185	CB460646	---	transcribed sequence	---	CB460646	---
Bt.2347.3.S1_a_at	0.0187	506544	PFKM	phosphofructokinase, muscle	61411	AV615615	NM_001075268
Bt.13410.1.S1_at	0.0196	511190	RPS6KA3	ribosomal protein S6 kinase, 90kDa, polypeptide 3	10682	AW465031	NM_001098937
Bt.13975.2.A1_at	0.0196	515900	PLA1A	phospholipase A1 member A	20385	CB165386	NM_001015610
Bt.14056.1.A1_at	0.0196	510743	ARHGAP18	Rho GTPase activating protein 18	14056	CK959823	NM_001110772
Bt.18571.1.S1_at	0.0196	520521	DLGAP4	discs, large (Drosophila) homolog-associated protein 4	91455	AW657304	NM_001077942
Bt.22369.2.S1_at	0.0196	525051	BRD3	Bromodomain containing 3	74262	BM087046	NM_001076873
Bt.22421.1.A1_at	0.0196	530325	LOC530325	similar to signal peptide peptidase-like 2A	22421	CB530696	XM_608794
Bt.4555.1.S1_at	0.0196	617210	ETFB	electron-transfer-flavoprotein, beta polypeptide	38985	CK952372	NM_001038582
Bt.14657.1.A1_at	0.0211	508365	BCL2L14	Bcl2-like 14 (apoptosis facilitator)	14657	CK945569	NM_001015544
Bt.23334.1.A1_at	0.0211	CF766693	---	transcribed sequence	---	CF766693	---
Bt.23399.1.S1_at	0.0211	512571	PKM2	pyruvate kinase, muscle	40497	CK970094	XM_590109
Bt.6080.1.S1_at	0.0211	507431	ECH1	enoyl Coenzyme A hydratase 1, peroxisomal	58971	CK771998	XM_866888
Bt.18165.1.A1_at	0.0215	538094	MAPK6	mitogen-activated protein kinase 6	63187	CB439535	XM_605323
Bt.13730.1.A1_at	0.0218	408003	ATG4A	ATG4 autophagy related 4 homolog A (S. cerevisiae)	13730	BF775534	NM_001001171
Bt.2070.2.A1_at	0.0218	541175	DUSP10	dual specificity phosphatase 10	2070	AV593991	NM_001034725
Bt.22594.1.S1_at	0.0218	789894	LOC789894	similar to PAP-associated domain-containing protein 5	22594	CB535199	XM_001256515
Bt.5520.1.S1_at	0.0218	327669	IDH2	isocitrate dehydrogenase 2 (NADP+), mitochondrial	5520	NM_175790.2	NM_175790
Bt.11667.1.A1_at	0.022	613462	ARL2BP	ADP-ribosylation factor-like 2 binding protein	11667	AU277473	NM_001076274
Bt.18623.1.A1_at	0.022	510159	MAPRE2	microtubule-associated protein, RP/EB family, member 2	65216	CB536192	NM_001034374
Bt.9949.2.S1_at	0.0225	533851	PDLIM7	PDZ and LIM domain 7 (enigma)	9949	CK974446	NM_001017947 /// NM_001113251
Bt.22594.2.S1_a_at	0.0227	789894	LOC789894	similar to PAP-associated domain-containing protein 5	22594	CB429219	XM_001256515
Bt.2347.2.S1_at	0.0243	506544	PFKM	phosphofructokinase, muscle	61411	AV615616	NM_001075268
Bt.3026.1.A1_at	0.0258	533803	TCEA3	transcription elongation factor A (SII), 3	28947	CB168961	NM_001046360
Bt.1112.1.S1_at	0.026	618204	SCN1B	sodium channel, voltage-gated, type I, beta	52720	BE721717	NM_001076496
Bt.18540.1.A1_at	0.026	CB445505	---	transcribed sequence	102495	CB445505	---
Bt.10041.1.S1_at	0.0277	534883	VPS72	vacuolar protein sorting 72 homolog (S. cerevisiae)	10041	CK771309	NM_001015658
Bt.7432.1.A1_at	0.0277	BM431635	---	transcribed sequence	89815	BM431635	---
Bt.1151.1.S1_at	0.0288	493998	CRABP2	cellular retinoic acid binding protein 2	1151	CK776242	NM_001008670
Bt.18571.3.A1_at	0.0288	520521	DLGAP4	discs, large (Drosophila) homolog-associated protein 4	91455	CB446393	NM_001077942
Bt.21372.2.S1_at	0.0288	513054	WHSC1L1	Wolf-Hirschhorn syndrome candidate 1-like 1	88726	BE485980	NM_001075595
Bt.28162.2.A1_at	0.0288	100125240	PLN	phospholamban	43673	BE757458	NM_001103319
Bt.3448.3.S1_at	0.0288	538094	MAPK6	Mitogen-activated protein kinase 6	63187	CK946036	XM_605323
Bt.393.1.S1_at	0.0288	281105	CTSB	cathepsin B	393	CK848423	NM_174031
Bt.5170.1.S1_at	0.0288	504764	GRHPR	glyoxylate reductase/hydroxypyruvate reductase	5170	CK849696	XM_580934
Bt.6964.1.S1_at	0.0288	780784	TMOD1	tropomodulin 1	101239	CK775013	NM_001079640
Bt.7541.1.S1_at	0.0288	789324	NME4	non-metastatic cells 4, protein expressed in	74407	AW656862	NM_001077906
Bt.9855.1.S1_at	0.0288	515553	SLC25A34	solute carrier family 25, member 34	9855	CK943201	NM_001034497
Bt.23499.1.S1_at	0.0311	786335	GYS1	glycogen synthase 1 (muscle)	102939	CF615578	NM_001101299
Bt.17952.1.A1_at	0.0312	507149	CDK8	cyclin-dependent kinase 8	17952	CK966136	XM_583707
Bt.7421.1.S1_at	0.0327	616223	LOC616223	similar to dysferlin interacting protein 1	52165	AV596388	XM_869283
Bt.11487.1.A1_at	0.0329	509502	PTCD3	Pentatricopeptide repeat domain 3	59426	CK849528	NM_001046034
Bt.12583.1.A1_at	0.0329	613907	BHLHB3	bHLH Class B3, DEC2, SHARP-1	45927	CA035005	---
Bt.19616.1.A1_at	0.0329	511371	SIX1	SIX homeobox 1	47753	CB467796	XM_588692
Bt.4160.1.S1_at	0.0329	282095	TNNT1	troponin T type 1 (skeletal, slow)	4160	NM_174474.1	NM_174474
Bt.7619.1.S1_at	0.0329	767943	TTYH1	tweety homolog 1 (Drosophila)	7619	CK770607	NM_001077015
Bt.19420.1.S1_at	0.0343	CB464927	PDE7A	similar to phosphodiesterase 7A	---	CB464927	---
Bt.14050.1.S1_at	0.0343	CB530355	LOC510404	similar to Nck-associated protein 1	65545	CB530355	---
Bt.21584.1.S1_at	0.0346	513530	OXSM	3-oxoacyl-ACP synthase, mitochondrial	21584	CK973636	NM_001075624
Bt.27840.1.S1_at	0.0346	515228	MRPS23	mitochondrial ribosomal protein S23	27840	BP109889	NM_001046192
Bt.27025.1.S1_at	0.0347	617788	UFSP2	UFM1-specific peptidase 2	20434	CK777771	NM_001076477 /// XM_001788902
Bt.25555.1.S1_at	0.0348	532910	LRRC28	leucine rich repeat containing 28	34089	CK771220	NM_001038156
Bt.11448.1.S1_at	0.0348	786336	PTMA	prothymosin, alpha (gene sequence 28)	11448	CK948850	XM_001253150
Bt.120.1.S1_at	0.0348	282041	ROCK2	Rho-associated, coiled-coil containing protein kinase 2	120	NM_174452.2	NM_174452
Bt.13189.2.S1_at	0.0348	529245	ORC4L	origin recognition complex, subunit 4-like (yeast)	13189	CB227466	NM_001046301
Bt.22310.1.S1_at	0.0348	505320	ARIH2	ariadne homolog 2 (Drosophila)	22310	CB450044	XM_868367
Bt.24433.1.S1_at	0.0348	515194	MRPL39	mitochondrial ribosomal protein L39	52912	AW356296	NM_001080730
Bt.24927.1.A1_at	0.0348	533823	ARHGEF6	Rac/Cdc42 guanine nucleotide exchange factor (GEF) 6	15231	CK774362	XM_865157
Bt.25419.1.A1_at	0.0348	767959	PACRG	PARK2 co-regulated	61691	CK769829	NM_001077027
Bt.26550.1.S1_at	0.0348	513061	ABCF2	ATP-binding cassette, sub-family F (GCN20), member 2	26550	CK771579	NM_001046136
Bt.13975.1.S1_a_at	0.0377	613972	APOD	apolipoprotein D	64625	CK834593	NM_001076301
Bt.12659.2.S1_a_at	0.0386	514147	PWP1	PWP1 homolog (S. cerevisiae)	12659	CB450511	NM_001046166
Bt.13535.3.S1_at	0.0386	510635	HIATL1	hippocampus abundant transcript-like 1	13535	CF762495	NM_001083662
Bt.22106.2.S1_at	0.0386	533729	PAK1	p21 protein (Cdc42/Rac)-activated kinase 1	17706	CB444452	NM_001076898
Bt.9585.1.S1_at	0.0394	510679	ALAD	aminolevulinate, delta-, dehydratase	37574	CK973838	NM_001014895
Bt.1263.1.S1_at	0.0403	281797	GNGT2	guanine nucleotide binding protein (G protein), gamma transducing activity polypeptide 2	1263	NM_174328.2	NM_174328
Bt.9755.1.S1_at	0.0405	513262	TEX2	testis expressed 2	64908	CK977042	NM_001101970
Bt.2070.3.S1_at	0.0414	541175	DUSP10	dual specificity phosphatase 10	2070	AW652581	NM_001034725
Bt.24742.1.S1_at	0.0414	505683	LOC505683	similar to Tubulin polyglutamylase complex subunit 1 (PGs1)	24742	CK775663	XM_582010
Bt.4532.1.S1_at	0.0414	282684	CSNK1A1	casein kinase 1, alpha 1	65222	NM_174711.2	NM_174711
Bt.5106.2.S1_at	0.0414	281793	GNAS	GNAS complex locus	64619	M13006.1	NM_181021
Bt.12211.1.S1_at	0.0422	505355	PECI	Peroxisomal D3,D2-enoyl-CoA isomerase	47386	CB165818	NM_001034242
Bt.13324.2.S1_a_at	0.0422	281235 613338	IDH1 IDH3B	isocitrate dehydrogenase 1 (NADP+), soluble /// isocitrate dehydrogenase 3 (NAD+) beta	13324	AF090321.1	NM_181012 /// XM_864062 /// XM_872571
Bt.21054.1.A1_at	0.0422	506787	PDE8A	phosphodiesterase 8A	21054	CK773933	XM_583282
Bt.23225.1.S1_at	0.0422	CK847417	---	transcribed sequence	64980	CK847417	---
Bt.24039.1.A1_at	0.0422	522998	LOC522998	similar to coiled-coil domain containing 6	---	BP104679	XR_028333
Bt.27072.1.A1_at	0.0422	506557	PB1	polybromo 1	17472	CK773335	XM_583018
Bt.13390.2.S1_a_at	0.0423	509952	DECR1	2,4-dienoyl CoA reductase 1, mitochondrial	13390	CK943165	NM_001075423
Bt.17102.3.S1_at	0.0428	532726	PPP1R2	protein phosphatase 1, regulatory (inhibitor) subunit 2	7968	AV614709	NM_001035392
Bt.23607.1.S1_at	0.0428	532785	HADH	hydroxyacyl-Coenzyme A dehydrogenase	58717	CB530173	NM_001046334
Bt.8305.1.A1_at	0.0428	536793	FXR1	fragile X mental retardation, autosomal homolog 1	26482	AW266900	NM_001038562
Bt.21092.1.S1_at	0.0431	510769	NDEL1	nudE nuclear distribution gene E homolog (A. nidulans)-like 1	58167	CK956361	XM_001255095
Bt.13128.1.S1_at	0.0432	286840	SDHB	succinate dehydrogenase complex, subunit B, iron sulfur (Ip)	13128	CK966545	NM_001040483
Bt.15616.1.S1_at	0.0432	510085	SLC16A3	solute carrier family 16, member 3 (monocarboxylic acid transporter 4)	48774	CK770544	NM_001109980
Bt.16739.1.A1_at	0.0432	CB426644	---	transcribed sequence	89558	CB426644	---
Bt.5848.2.S1_at	0.0432	518117	ATP2A1	ATPase, Ca++ transporting, cardiac muscle, fast twitch 1	62768	CF614616	NM_001075767
Bt.13505.1.S1_at	0.0433	280808	GPI	glucose phosphate isomerase	49587	CB168820	NM_001040471
Bt.136.1.S1_at	0.0433	281563	UCP3	uncoupling protein 3 (mitochondrial, proton carrier)	136	NM_174210.1	NM_174210
Bt.29936.1.S1_at	0.0433	CK957838	---	transcribed sequence	54098	CK957838	---
Bt.20984.1.S1_at	0.0444	767938	GBAS	glioblastoma amplified sequence	20984	BE754035	NM_001077011
Bt.11208.1.S1_at	0.0451	407095 520277	CALM3 LOC407095	calmodulin 3 (phosphorylase kinase, delta) /// calmodulin	63542	BM107358	NM_001046249
Bt.115.1.S1_at	0.0451	280762	DDC	dopa decarboxylase (aromatic L-amino acid decarboxylase)	115	NM_173907.2	NM_173907
Bt.23291.1.S1_at	0.0451	520277 617095	CALM1 CALM3	calmodulin 1 calmodulin 3	53264	CB530156	NM_001046249 /// XM_869284
Bt.2848.1.S1_at	0.0451	613767	CINP	cyclin-dependent kinase 2-interacting protein	29603	CK847891	NM_001099125
Bt.7105.1.S1_at	0.0451	533199	MAP2K1	mitogen-activated protein kinase kinase 1	29185	CK772376	NM_001130752 /// XM_612526
Bt.8136.1.S1_at	0.0451	281884	KCNQ3	potassium voltage-gated channel, KQT-like subfamily, member 3	8136	NM_174374.2	NM_174374
Bt.26739.1.S1_at	0.0463	505393	TOMM40L	Translocase of outer mitochondrial membrane 40 homolog (yeast)-like	26739	CK948415	NM_001014853
Bt.562.1.S1_at	0.0463	282304	PFKFB1	6-phosphofructo-2-kinase/fructose-2,6-biphosphatase 1	562	NM_174572.2	NM_174572
Bt.833.1.A1_at	0.0463	540537	ANAPC5	anaphase promoting complex subunit 5	30511	AV589110	XM_863968
Bt.17876.1.A1_at	0.0478	CK847416	~HDAC9	similar to histone deacetylase 9	27558	CK847416	---
Bt.28741.1.A1_at	0.0478	507226	TPX2	TPX2, microtubule-associated, homolog (Xenopus laevis)	28741	CK778368	NM_001098898
Bt.3730.1.S1_at	0.0479	614212	LMO4	LIM domain only 4	3730	BM252109	NM_001034751
Bt.22771.1.S1_at	0.0482	616979	RAB31	RAB31, member RAS oncogene family	64758	CK950805	NM_001076944
Bt.29953.1.A1_at	0.0482	CK977005	---	transcribed sequence	29953	CK977005	---
Bt.13788.1.S1_at	0.0483	BE664691	---	transcribed sequence	13788	BE664691	---
Bt.20020.2.S1_at	0.0485	514807	HABP4	hyaluronan binding protein 4	20020	AV665918	NM_001081523
Bt.5341.1.S1_at	0.0485	280884	OGN	osteoglycin	5341	M37974.1	NM_173946
Bt.19522.1.S1_at	0.0486	534708	RAB11A	RAB11A, member RAS oncogene family	44630	CK957037	NM_001038162
Bt.17102.1.S1_at	0.0487	532726	PPP1R2	Protein phosphatase 1, regulatory (inhibitor) subunit 2	7968	AV614708	NM_001035392
Bt.1739.2.S1_at	0.0487	CB427840	---	transcribed sequence	34205	CB427840	---
Bt.5626.2.S1_at	0.0487	508999	KLC1	Kinesin light chain 1	48334	CK944473	NM_001098915
Bt.6613.1.S1_at	0.0487	CK778373	---	transcribed sequence	89842	CK778373	---
Bt.12659.1.S1_at	0.0495	514147	PWP1	PWP1 homolog (S. cerevisiae)	12659	BF077148	NM_001046166
Bt.12191.1.S1_at	0.0499	BM089574	---	transcribed sequence	44643	BM089574	---
Bt.26524.1.S1_at	0.0501	617129	CCDC90A	Coiled-coil domain containing 90A	6391	CK955192	NM_001102309
Bt.7084.1.S1_at	0.0503	539375	ACTN3	actinin, alpha 3	7084	BF652763	NM_001076157
Bt.9139.1.A1_at	0.0503	616332	LOC616332	hypothetical LOC616332	9139	CB439719	NM_001101255
Bt.3883.1.S1_at	0.0507	280763	DDO	D-aspartate oxidase	25930	NM_173908.2	NM_173908
Bt.16296.1.A1_at	0.0507	540568	ATP2A2	ATPase, Ca++ transporting, cardiac muscle, slow twitch 2	24649	CB453612	XM_612129
Bt.24221.1.S1_at	0.0507	CK940584	---	transcribed sequence	24221	CK940584	---
Bt.24792.1.S1_at	0.0507	510653	LYSMD1	LysM, putative peptidoglycan-binding, domain containing 1	58596	CK772399	NM_001077898
Bt.15711.2.S1_a_at	0.0514	540653	PCBP2	poly(rC) binding protein 2	49118	CK948395	NM_001034711
Bt.21603.2.S1_at	0.0514	540607	RNF121	ring finger protein 121	21603	BE750002	NM_001102245
Bt.21930.1.S1_at	0.0516	CB432316	---	transcribed sequence	21930	CB432316	---
Bt.24676.1.S1_at	0.0516	515999	SAR1B	SAR1 homolog B (S. cerevisiae)	74559	BF601744	NM_001035315
Bt.26688.2.S1_a_at	0.0516	533321	FRMD3	FERM domain containing 3	46017	BF429567	NM_001046348
Bt.9907.1.S1_at	0.0516	BG358235	---	transcribed sequence	91632	BG358235	---
Bt.20020.1.S1_at	0.0518	514807	HABP4	hyaluronan binding protein 4	20020	CB461977	NM_001081523
Bt.21680.1.S1_a_at	0.0518	790878	PIR	pirin (iron-binding nuclear protein)	17884	CK776403	NM_001102358
Bt.23094.4.S1_at	0.0518	282138 782922	AKR1C4 LOC782922	aldo-keto reductase family 1, member C4	64820	M86544.1	NM_181027 /// XM_001250622
Bt.24802.2.S1_a_at	0.0518	510085	SLC16A3	solute carrier family 16, member 3 (monocarboxylic acid transporter 4)	48774	BI976215	NM_001109980
Bt.26750.2.A1_at	0.0518	513822	LOC513822	similar to RIKEN cDNA 4832428D23	65066	CK772972	NM_001014922
Bt.9244.1.A1_at	0.0518	538571	RSPRY1	ring finger and SPRY domain containing 1	9244	CB424161	NM_001083734
Bt.13434.2.A1_at	0.0521	514986	MKRN1	Makorin ring finger protein 1	11395	CK836482	NM_001104979
Bt.25615.1.A1_at	0.0525	505683	LOC505683	similar to Tubulin polyglutamylase complex subunit 1 (PGs1)	24742	CK771530	XM_582010
Bt.16364.1.A1_at	0.0534	527539	LRRC48	leucine rich repeat containing 48	16364	CB462015	NM_001102111
Bt.21113.1.S1_a_at	0.0534	509459	CPT1B	carnitine palmitoyltransferase 1B (muscle)	21113	CK777748	NM_001034349
Bt.21926.2.S1_a_at	0.0534	508142	TOMM34	Translocase of outer mitochondrial membrane 34	21926	BE809744	XM_865451
Bt.23662.2.S1_at	0.0534	506764	RNF34	ring finger protein 34	23662	CK956837	NM_001014858
Bt.28159.1.S1_at	0.0534	541153	DTNA	dystrobrevin, alpha	6911	CK945807	XM_001788826
Bt.28506.1.A1_at	0.0534	541028	UCK2	uridine-cytidine kinase 2	28506	BM251767	XM_614178
Bt.3024.1.S1_at	0.0534	519172	BLOC1S2	biogenesis of lysosomal organelles complex-1, subunit 2	3024	CK769779	XM_001252335 /// XM_597385
Bt.5226.1.S1_at	0.0534	282068	SFRP1	secreted frizzled-related protein 1	5226	NM_174460.2	NM_174460
Bt.21053.2.S1_at	0.0537	534995	SYNGR1	synaptogyrin 1	48966	AW345252	NM_001034623
Bt.22135.1.A1_at	0.054	510831	NRSN1	neurensin 1	22135	CB434941	NM_001075469
Bt.9927.1.A1_at	0.0543	CB466224	---	transcribed sequence	9927	CB466224	---
Bt.12508.1.S1_at	0.0558	614103	DCTPP1	dCTP pyrophosphatase 1	44816	CB456944	NM_001038202
Bt.20446.2.S1_at	0.0558	BF046404	---	transcribed sequence	30094	BF046404	---
Bt.21607.1.S1_at	0.0558	521378	CITED2	Cbp/p300-interacting transactivator, with Glu/Asp-rich carboxy-terminal domain, 2	21607	CK944409	NM_001075819
Bt.21849.1.S1_at	0.0558	511222	ACADS	acyl-Coenzyme A dehydrogenase, C-2 to C-3 short chain	49540	CK948087	NM_001034401
Bt.24689.1.S1_at	0.0558	CK816645	---	transcribed sequence	59103	CK816645	---
Bt.28741.2.S1_at	0.0558	507226	TPX2	TPX2, microtubule-associated, homolog (Xenopus laevis)	28741	CB452551	NM_001098898
Bt.6075.1.S1_at	0.0558	CB432935	---	transcribed sequence	6075	CB432935	---
Bt.654.1.A1_at	0.0558	506325	ZMYND11	zinc finger, MYND domain containing 11	36337	CB461305	NM_001045940
Bt.9221.1.A1_at	0.0558	788760	EHBP1L1	EH domain binding protein 1-like 1	29321	CK963798	XM_001254719
Bt.11092.1.S1_at	0.056	AU278374	---	transcribed sequence	96818	AU278374	---
Bt.1248.1.S1_at	0.056	517031	GGA2	Golgi associated, gamma adaptin ear containing, ARF binding protein 2	1248	CK770546	XM_595195
Bt.15888.1.A1_at	0.056	534325	CUL3	cullin 3	64031	CB168066	XM_614056
Bt.28411.1.S1_at	0.056	529171	SLC16A6	Solute carrier family 16, member 6 (monocarboxylic acid transporter 7)	28411	CK947663	XM_607611
Bt.3626.1.S1_at	0.056	539196	RPS11	ribosomal protein S11	3626	BM251908	NM_001024568
Bt.461.1.S1_at	0.0562	282601	ARF4	ADP-ribosylation factor 4	65529	NM_174689.1	NM_174689
Bt.21670.1.A1_at	0.0573	767932	AZI2	5-azacytidine induced 2	59796	CK773832	NM_001077005
Bt.13345.1.A1_at	0.0573	784739	LOC784739	similar to ubiquitin specific peptidase 54	13345	CB456701	XM_001250465
Bt.25636.1.A1_at	0.0573	533134	MBTPS2	membrane-bound transcription factor peptidase, site 2	38187	CK772326	NM_001075981
Bt.21897.1.S1_at	0.0578	541287	RNF217	Ring finger protein 217	21897	CK775781	XM_615503
Bt.27858.2.S1_at	0.0578	534351	TMED5	transmembrane emp24 protein transport domain containing 5	27858	CB420845	NM_001046377
Bt.13730.2.S1_at	0.0579	408003	ATG4A	ATG4 autophagy related 4 homolog A (S. cerevisiae)	13730	AV595619	NM_001001171
Bt.13988.1.S1_at	0.0579	615432	DUSP3	dual specificity phosphatase 3	15301	CK980996	NM_001076374
Bt.21542.1.S1_at	0.0579	782059	SCYL2	SCY1-like 2 (S. cerevisiae)	21542	CB450365	NM_001102529
Bt.28385.1.A1_at	0.0582	514657 534616	BCHE	butyrylcholinesterase	42172	CK769690	NM_001076906
Bt.4474.2.S1_a_at	0.0582	507590	DBNDD2	dysbindin (dystrobrevin binding protein 1) domain containing 2	49618	BM929217	NM_001130748 /// XM_584231
Bt.25225.1.A1_at	0.0585	534322	LOC534322	similar to wings apart-like homolog (Drosophila)	14679	CK957819	XM_001789058
Bt.10797.2.S1_a_at	0.0602	615093	LOC615093	hypothetical LOC615093	10797	CK954950	XM_866800
Bt.23357.1.S1_at	0.0616	614145	IDH3G	isocitrate dehydrogenase 3 (NAD+) gamma	23357	CK954566	NM_001076313
Bt.19161.1.S1_at	0.0618	509107	ATF4	activating transcription factor 4 (tax-responsive enhancer element B67)	49442	AV601057	NM_001034342
Bt.29065.1.A1_at	0.0626	CK953331	---	transcribed sequence	69254	CK953331	---
Bt.4351.2.S1_at	0.0626	614152	BRE	brain and reproductive organ-expressed (TNFRSF1A modulator)	4351	BG689387	NM_001102274
Bt.4474.1.S1_at	0.0626	507590	DBNDD2	dysbindin (dystrobrevin binding protein 1) domain containing 2	49618	CB430946	NM_001130748 /// XM_584231
Bt.8706.1.S1_at	0.0626	615215	MAPKAPK3	mitogen-activated protein kinase-activated protein kinase 3	43984	CK777104	NM_001034779
Bt.18.1.S1_at	0.0634	282116	VAMP2	vesicle-associated membrane protein 2 (synaptobrevin 2)	88332	NM_174483.2	NM_174483
Bt.19330.1.A1_s_at	0.0634	CB461022	---	transcribed sequence	24536	CB461022	---
Bt.24096.1.A1_at	0.0634	BP105260	---	transcribed sequence	24096	BP105260	---
Bt.24317.1.A1_at	0.0634	534321	SOX6	SRY (sex determining region Y)-box 6	62052	CK775188	XM_001250844 /// XM_614052
Bt.28139.1.S1_at	0.0634	614107	LOC614107	similar to Hexokinase-2 (Hexokinase type II) (HK II)	36679	CK952050	XM_865470
Bt.7988.1.A1_at	0.0642	CB448414	---	transcribed sequence	---	CB448414	---
Bt.14205.1.S1_at	0.0645	510495	LMBRD1	LMBR1 domain containing 1	14205	CK950517	NM_001035092
Bt.20294.1.S1_at	0.0645	526516	HOOK2	hook homolog 2 (Drosophila)	20294	AW670504	NM_001024555
Bt.653.1.S1_at	0.0645	515816	NEK6	NIMA (never in mitosis gene a)-related kinase 6	653	CK975598	NM_001098988
Bt.7215.1.S1_at	0.0645	282130	ACADVL	acyl-coenzyme A dehydrogenase, very long chain	48920	AV606323	NM_174494
Bt.1793.3.S1_at	0.0656	512666	AVEN	Apoptosis, caspase activation inhibitor	1793	BF602022	XM_590221
Bt.11902.3.A1_at	0.0661	CB425021	---	transcribed sequence	11902	CB425021	---
Bt.2723.1.A1_at	0.0661	514462	CDO1	cysteine dioxygenase, type I	2723	CK973489	NM_001034465
Bt.21680.1.S1_at	0.0668	790878	PIR	pirin (iron-binding nuclear protein)	17884	CK776403	NM_001102358
Bt.14211.1.A1_at	0.0669	CB461930	---	transcribed sequence	92521	CB461930	---
Bt.18079.1.A1_at	0.0669	512341	MLYCD	Malonyl-CoA decarboxylase	46080	CK774995	NM_001098946
Bt.18755.1.A1_at	0.0669	790875	LOC790875	hypothetical protein LOC790875	48740	CB450025	NM_001101310
Bt.21135.1.S1_at	0.0669	533298	KIAA1715	KIAA1715	50207	AW356688	NM_001075989
Bt.22084.1.A1_at	0.0669	515903	FOXP1	Forkhead box P1	17953	CK974745	NM_001083689
Bt.9667.2.S1_at	0.0669	538968	API5	Apoptosis inhibitor 5	9667	CB458212	XM_583981
Bt.4532.1.S2_at	0.0672	282684	CSNK1A1	casein kinase 1, alpha 1	65222	AU275745	NM_174711
Bt.21342.1.S1_at	0.0673	618250	S100A14	S100 calcium binding protein A14	76113	CB468252	NM_001079634
Bt.1418.1.S1_at	0.0673	CK950692	---	transcribed sequence	1418	CK950692	---
Bt.378.1.S1_at	0.0678	338040	ATP5I	ATP synthase, H+ transporting, mitochondrial F0 complex, subunit e	49173	NM_176639.2	NM_176639
Bt.1758.1.S1_at	0.068	512161 781180 782928	HMGN2 LOC781180 LOC782928	similar to high mobility group nucleosomal binding domain 2	1758	CK962293	NM_001098945 /// XM_001249469 /// XM_001249942
Bt.2255.1.S1_at	0.0684	511969	IMPDH2	IMP (inosine monophosphate) dehydrogenase 2	2255	CB172231	NM_001034416
Bt.12261.1.A1_at	0.0685	532606	TASP1	taspase, threonine aspartase, 1	44002	BE236996	NM_001034577
Bt.1798.1.S1_at	0.0688	281909	MANBA	mannosidase, beta A, lysosomal	1798	AF098512.1	NM_174387
Bt.21723.3.S1_at	0.0688	528728	PELO	pelota homolog (Drosophila)	76149	BI682962	NM_001034566
Bt.460.1.S1_s_at	0.0688	280946 783512	TST	thiosulfate sulfurtransferase (rhodanese)	89197	NM_177489.1	NM_177489 /// XM_001249945
Bt.16932.1.A1_at	0.069	CB424869	---	transcribed sequence	---	CB424869	---
Bt.11215.1.S1_a_at	0.0697	282096	TNNT3	troponin T type 3 (skeletal, fast)	11215	AB085595.1	NM_001001441
Bt.17582.1.S1_at	0.0702	CB431262	---	transcribed sequence	48205	CB431262	---
Bt.21015.1.S1_at	0.0707	512902	CRAT	carnitine acetyltransferase	61867	CK775296	NM_001075587
Bt.23638.1.S1_at	0.0714	615197	PCNP	PEST proteolytic signal containing nuclear protein	9809	CK968742	NM_001038205
Bt.24804.1.S1_at	0.0719	533378	MYLK2	Myosin light chain kinase 2	54482	CK774285	NM_001083719
Bt.2314.1.S1_at	0.0725	281485	SELL	selectin L	2314	NM_174182.1	NM_174182
Bt.10343.1.A1_at	0.0726	509823	PALMD	palmdelphin	10343	CK778864	NM_001035079
Bt.21050.1.S1_at	0.0727	506520	WNK2	WNK lysine deficient protein kinase 2	21050	CK773253	XM_582977
Bt.22163.1.S1_at	0.0727	540083	DNAJB5	DnaJ (Hsp40) homolog, subfamily B, member 5	64785	CK775336	NM_001014959
Bt.16935.1.A1_at	0.0732	539639	SENP2	SUMO1/sentrin/SMT3 specific peptidase 2	16935	CK943767	XM_001790120
Bt.967.2.S1_at	0.0732	CF767398	---	transcribed sequence	967	CF767398	---
Bt.1736.1.A1_at	0.0733	518795	SOCS1	suppressor of cytokine signaling 1	1736	BM364201	XM_864316
Bt.18135.2.A1_at	0.0733	539983	S100PBP	S100P binding protein	1197	CB464438	NM_001034687
Bt.1855.1.S1_at	0.0733	281102	CST3	cystatin C	1855	NM_174029.1	NM_174029
Bt.22019.1.S1_at	0.0733	767990	ATXN10	ataxin 10	22019	CK954645	NM_001077051
Bt.2587.1.S1_at	0.0736	520260	FH	fumarate hydratase	45986	CK770630	NM_001075803
Bt.27939.2.A1_a_at	0.0736	525346	NCOA1	nuclear receptor coactivator 1	55996	CK847587	XM_867432
Bt.5507.1.S1_at	0.0736	507168 615028 786430	LOC615028 LOC786430 RPL23A	similar to ribosomal protein L23a	5507	BP108713	NM_001045958 /// XM_001251320 /// XM_866556
Bt.12217.3.A1_at	0.0744	505824	NTRK2	Neurotrophic tyrosine kinase, receptor, type 2	64757	AW632014	NM_001075225
Bt.12434.1.S1_at	0.0744	505679	S100A16	S100 calcium binding protein A16	21035	CK948704	NM_001075218
Bt.14624.2.S1_at	0.0744	535683	PSMD14	proteasome (prosome, macropain) 26S subunit, non-ATPase, 14	31257	CB225168	NM_001076067
Bt.15231.1.S1_at	0.0744	533823	ARHGEF6	Rac/Cdc42 guanine nucleotide exchange factor (GEF) 6	15231	CK944525	XM_865157
Bt.16672.1.A1_at	0.0744	CB431645	---	---	39711	CB431645	---
Bt.20105.2.S1_at	0.0744	535589	TAX1BP1	Tax1 (human T-cell leukemia virus type I) binding protein 1	17392	AW462525	NM_001046409
Bt.21475.3.S1_at	0.0744	786013	AATF	Apoptosis antagonizing transcription factor	21475	AV615839	XM_001252957
Bt.2331.2.S1_at	0.0744	617017	RAMP1	receptor (G protein-coupled) activity modifying protein 1	35948	BM483726	NM_001083777
Bt.26869.1.A1_at	0.0744	CK774193	---	transcribed sequence	67348	CK774193	---
Bt.27538.1.A1_at	0.0744	509789	LOC509789	similar to acyl-CoA synthetase medium-chain family member 5	80371	CK846442	XM_586827
Bt.2993.2.A1_at	0.0744	614015	SMTNL1	smoothelin-like 1	2993	AV594984	XM_865319
Bt.29931.2.S1_at	0.0744	514928	KIF1C	kinesin family member 1C	29931	CK965256	XM_001253800 /// XM_592847
Bt.315.1.S1_at	0.0744	338079	NDUFS7	NADH dehydrogenase (ubiquinone) Fe-S protein 7	315	X65020.1	NM_001038022
Bt.448.1.S1_at	0.0744	287026	PLCB1	phospholipase C, beta 1 (phosphoinositide-specific)	448	NM_174817.1	NM_174817
Bt.5003.2.S1_a_at	0.0744	616367	EMCN	endomucin	65771	CK831358	NM_001076420
Bt.5408.1.A1_at	0.0744	514394	UCHL1	ubiquitin carboxyl-terminal esterase L1	58848	CB468334	NM_001046172
Bt.9835.1.S1_at	0.0744	CB439597	---	transcribed sequence	---	CB439597	---
Bt.19097.1.A1_at	0.0748	CB461915	---	transcribed sequence	24096	CB461915	---
Bt.5582.1.S1_at	0.0759	617797	SH3BGR	similar to SH3 domain-binding glutamic acid-rich protein	---	BF076059	XR_042770
Bt.26998.1.A1_s_at	0.0761	509486	TNNC1	troponin C type 1 (slow)	49083	BM967521	NM_001034351 /// XM_586454
Bt.7023.1.S1_at	0.0761	404123	FAHD2A	fumarylacetoacetate hydrolase domain containing 2A	7023	NM_205790.1	NM_205790
Bt.22169.1.S1_at	0.077	540303	ENO3	enolase 3 (beta, muscle)	49475	BM088075	NM_001034702
Bt.24926.1.S1_at	0.077	BI775712	---	transcribed sequence	24926	BI775712	---
Bt.23627.1.S1_at	0.0775	100125221	UBAP2L	ubiquitin associated protein 2-like	48769	CK967698	NM_001103107
Bt.26009.1.A1_at	0.0778	533298	KIAA1715	KIAA1715	50207	CK777681	NM_001075989
Bt.27885.1.S1_at	0.0778	614063	MGC140340	hypothetical LOC614063	82031	CK847636	NM_001083765
Bt.22535.1.S1_at	0.0783	505888	BTBD10	BTB (POZ) domain containing 10	58612	CB433671	NM_001075230
Bt.5108.1.S1_at	0.0787	515902	PCCB	propionyl Coenzyme A carboxylase, beta polypeptide	5108	BE476729	NM_001038548
Bt.24444.1.A1_at	0.0791	535597	RORA	RAR-related orphan receptor A	56061	CK777725	XM_615704
Bt.4694.1.S1_at	0.0797	521747	EIF3I	eukaryotic translation initiation factor 3, subunit I	37139	CB165678	NM_001015628
Bt.23857.1.A1_at	0.0797	524166	RNF144B	ring finger protein 144B	66635	CK940490	NM_001099028
Bt.1946.1.S1_at	0.0807	526612	NSFL1C	NSFL1 (p97) cofactor (p47)	53665	CK953323	NM_001034557
Bt.1059.2.S1_at	0.0813	540568	ATP2A2	ATPase, Ca++ transporting, cardiac muscle, slow twitch 2	24649	AW654628	XM_612129
Bt.12911.1.S1_at	0.0813	337890	RPL26	ribosomal protein L26	49129	BP107427	NM_001015512
Bt.15990.1.S1_at	0.0813	337925	SLC8A1	solute carrier family 8 (sodium/calcium exchanger), member 1	65322	NM_176632.2	NM_176632
Bt.16919.1.A1_at	0.0813	CB449945	---	transcribed sequence	92862	CB449945	---
Bt.17079.1.S1_a_at	0.0813	CK961027	---	transcribed sequence	102110	CK961027	---
Bt.18537.1.S1_at	0.0813	510844	LOC510844	similar to Zinc finger homeobox protein 3	---	BF039210	XR_027466
Bt.1905.1.S1_at	0.0813	505519	MYL2	myosin, light chain 2, regulatory, cardiac, slow	48942	BG224082	NM_001035025
Bt.19774.1.A1_at	0.0813	532571	WWC2	WW and C2 domain containing 2	11858	CK952701	XM_611687
Bt.21048.1.S1_at	0.0813	CB451766	---	transcribed sequence	64759	CB451766	---
Bt.22070.1.A1_at	0.0813	CB442209	---	transcribed sequence	22070	CB442209	---
Bt.23217.1.S1_at	0.0813	515067	PGAM2	phosphoglycerate mutase 2 (muscle)	23217	BM956547	NM_001038111
Bt.24433.2.A1_at	0.0813	515194	MRPL39	mitochondrial ribosomal protein L39	52912	CK772462	NM_001080730
Bt.26867.2.S1_a_at	0.0813	511767	EEPD1	endonuclease/exonuclease/phosphatase family domain containing 1	53572	AV613133	NM_001034409
Bt.28162.1.S1_at	0.0813	100125240	PLN	phospholamban	43673	BG224196	NM_001103319
Bt.4138.2.S1_at	0.0813	281572	VEGFA	vascular endothelial growth factor A	4138	CB450531	NM_174216
Bt.7968.2.S1_at	0.0813	532726	PPP1R2	Protein phosphatase 1, regulatory (inhibitor) subunit 2	7968	BG358482	NM_001035392
Bt.26080.1.S1_at	0.0839	532872	MYOM3	myomesin family, member 3	---	BI536164	XM_612077
Bt.7781.1.S1_at	0.0839	514966 782993	RPL7	ribosomal protein L7	67188	CB170514	NM_001014928 /// XM_001250732
Bt.12661.1.A1_at	0.085	513504	MCCC1	methylcrotonoyl-Coenzyme A carboxylase 1 (alpha)	12661	CK849910	XM_591194
Bt.16082.1.S1_at	0.085	518321	C1QBP	complement component 1, q subcomponent binding protein	16082	CB531758	NM_001034527
Bt.3780.1.S1_at	0.085	100125763	LOC100125763	neuronal protein 3.1	64815	CB447606	NM_001105045
Bt.3823.1.S1_at	0.085	614488	AVPI1	arginine vasopressin-induced 1	56340	CK776195	NM_001034760
Bt.4008.1.S1_at	0.085	282389	TXNRD2	thioredoxin reductase 2	4008	NM_174626.2	NM_174626
Bt.15805.1.S1_at	0.0858	613499	R3HDM2	R3H domain containing 2	61431	CB433389	NM_001078034
Bt.16843.1.A1_at	0.0858	615846	CHCHD10	coiled-coil-helix-coiled-coil-helix domain containing 10	62215	CK960646	NM_001083774
Bt.24221.2.S1_at	0.0858	CK971236	---	transcribed sequence	24221	CK971236	---
Bt.24802.1.S1_at	0.0858	510085	SLC16A3	solute carrier family 16, member 3 (monocarboxylic acid transporter 4)	48774	CK775041	NM_001109980
Bt.24803.1.S1_at	0.0858	617717	NG5	NG5	38379	CK775379	NM_001076947 /// XM_870027
Bt.26836.2.A1_at	0.0858	504633	COQ2	coenzyme Q2 homolog, prenyltransferase (yeast)	87535	CK981695	NM_001045893
Bt.28822.1.A1_at	0.0858	CK941846	---	transcribed sequence	---	CK941846	---
Bt.29888.1.S1_at	0.0858	407228	CUL1	cullin 1	6490	BF041956	XM_876699
Bt.5966.1.A1_at	0.0858	505968	ACADM	acyl-coenzyme A dehydrogenase, C-4 to C-12 straight chain	61205	CK964320	NM_001075235
Bt.27884.1.S1_at	0.0865	532505	ZADH2	Zinc binding alcohol dehydrogenase domain containing 2	76141	CK847758	NM_001075964
Bt.3599.1.S1_at	0.0865	614028	NPM1	nucleophosmin (nucleolar phosphoprotein B23, numatrin)	61659	CB166882	NM_001035441
Bt.612.2.S1_at	0.087	506406	GSR	glutathione reductase	---	CB464184	XM_001788680
Bt.26622.1.S1_a_at	0.0875	504914	UROD	uroporphyrinogen decarboxylase	49828	CK771613	XM_581108
Bt.4283.1.S1_at	0.0875	616065	LOC616065	similar to 60S ribosomal protein L22 (Heparin binding protein HBp15)	---	BP107042	XM_868033
Bt.1.1.S1_at	0.0882	282419	CSNK2A1	casein kinase 2, alpha 1 polypeptide	64603	NM_174635.1	NM_174635
Bt.10885.2.S1_at	0.0882	506107	BAG2	BCL2-associated athanogene 2	44554	CB166598	NM_001034264
Bt.12290.1.S1_at	0.0882	282011	PSIP1	PC4 and SFRS1 interacting protein 1	26201	AF474175.1	XM_590212
Bt.13421.1.S1_at	0.0882	615657	ATG4D	ATG4 autophagy related 4 homolog D (S. cerevisiae)	30691	CB165746	NM_001099146
Bt.20588.1.S1_at	0.0882	CB419855	---	transcribed sequence	91825	CB419855	---
Bt.21365.1.S1_a_at	0.0882	513829	LOC513829	similar to Eukaryotic translation initiation factor 2-alpha kinase 4 (GCN2-like protein)	---	CB442897	XM_001787661
Bt.2266.3.S1_at	0.0882	505371	TRAF3IP3	TRAF3 interacting protein 3	48370	AW345777	NM_001024476 /// NM_001113245
Bt.2331.1.A1_at	0.0882	617017	RAMP1	receptor (G protein-coupled) activity modifying protein 1	35948	CB422119	NM_001083777
Bt.4327.1.S1_at	0.0882	506577	LOC506577	similar to ubiquitin associated protein 2	---	AW655123	XM_001787530
Bt.4670.1.S1_at	0.0882	539596	LOC539596	similar to Transforming growth factor-beta induced protein IG-H3 precursor	46833	CK774445	XR_028016
Bt.6298.1.S1_at	0.0882	541147	GPR125	G protein-coupled receptor 125	6298	CK965098	XM_614752
Bt.7537.1.S1_at	0.0882	615936	LOC615936	similar to autism susceptibility candidate 2	---	BE666861	XR_028209
Bt.9832.1.S1_at	0.0898	616088	MUSTN1	Musculoskeletal, embryonic nuclear protein 1	9832	CK778123	NM_001040589
Bt.10184.1.S1_a_at	0.0902	407122 523542	CSNK1D	casein kinase 1, delta	46945	CK960479	NM_001102080
Bt.11503.1.S1_a_at	0.0902	511779	MAP3K4	mitogen-activated protein kinase kinase kinase 4	48616	CB421747	XM_589178
Bt.6950.1.S1_at	0.0904	614236	SYS1	SYS1 Golgi-localized integral membrane protein homolog (S. cerevisiae)	18008	BF605333	NM_001046527
Bt.12639.1.S1_at	0.0906	538477	RALA	V-ral simian leukemia viral oncogene homolog A (ras related)	87356	CK976456	NM_001034644
Bt.27012.1.A1_at	0.0906	510408	PLCL2	phospholipase C-like 2	53256	CK771940	XM_587548
Bt.8953.1.S1_at	0.0906	282019	PTGES	prostaglandin E synthase	8953	NM_174443.2	NM_174443
Bt.9053.1.S1_a_at	0.0915	613568	MACROD1	MACRO domain containing 1	62929	BP109845	NM_001046509
Bt.20064.1.S1_at	0.0927	516106	TSHZ1	teashirt zinc finger homeobox 1	64960	CB448342	XM_594245
Bt.5310.1.S1_at	0.0927	280701	PPA1	pyrophosphatase (inorganic) 1	7870	CK845834	NM_001075118
Bt.12628.1.S1_at	0.0934	CK777152	---	transcribed sequence	12628	CK777152	---
Bt.7675.2.S1_at	0.0941	CB421412	---	transcribed sequence	90126	CB421412	---
Bt.27003.1.S1_at	0.0945	614455	RETSAT	Retinol saturase (all-trans-retinol 13,14-reductase)	11260	CK946791	XM_001790363
Bt.15972.1.S1_at	0.0964	281193	GJA1	gap junction protein, alpha 1, 43kDa	15972	NM_174068.1	NM_174068
Bt.5006.1.S1_at	0.0965	536619	PAIP2	poly(A) binding protein interacting protein 2	52795	CK954437	NM_001034636
Bt.4867.2.S1_at	0.0969	317655	MYH10	myosin, heavy chain 10, non-muscle	4057	AV592641	NM_174834
Bt.17488.1.A1_at	0.097	CK775297	---	transcribed sequence	48209	CB430996	---
Bt.21912.1.S2_at	0.0975	404130	EIF2C2	eukaryotic translation initiation factor 2C, 2	21912	CK775297	NM_205794
Bt.10329.1.A1_at	0.098	CK770073	---	transcribed sequence	100333	CK770073	---
Bt.20915.1.S1_at	0.098	506138	APOOL	apolipoprotein O-like	30637	CB466522	NM_001035031
Bt.21579.1.A1_at	0.098	519461	SLC22A1	solute carrier family 22 (organic cation transporter), member 1	21579	CK772645	NM_001101098
Bt.21912.1.S1_at	0.098	404130	EIF2C2	eukaryotic translation initiation factor 2C, 2	21912	NM_205794.1	NM_205794
Bt.8515.1.S1_at	0.098	515582	UBR5	ubiquitin protein ligase E3 component n-recognin 5	96829	BF774060	XM_593623
Bt.26080.2.S1_at	0.0982	532872	MYOM3	myomesin family, member 3	---	BM106973	XM_612077
Bt.26550.2.S1_at	0.0982	513061	ABCF2	ATP-binding cassette, sub-family F (GCN20), member 2	26550	CK836490	NM_001046136
Bt.5389.1.S1_at	0.0982	509613	EIF4EBP1	eukaryotic translation initiation factor 4E binding protein 1	5389	BF651644	NM_001077893
Bt.1808.1.S1_at	0.0992	512500	CYC1	cytochrome c-1	1808	CK954494	NM_001038090
Bt.22335.1.S1_a_at	0.0992	CF613794	---	transcribed sequence	43096	CF613794	---
Bt.23894.1.A1_at	0.0992	539754	UBE2J1	Ubiquitin-conjugating enzyme E2, J1 (UBC6 homolog, yeast)	23894	BP102868	XM_866344
Bt.26675.2.S1_a_at	0.0992	534423	C9H12orf49	chromosome 12 open reading frame 49 ortholog	26675	BF044955	NM_001076023
Bt.1985.1.S1_at	0.0995	614236	SYS1	SYS1 Golgi-localized integral membrane protein homolog (S. cerevisiae)	18008	BE483794	NM_001046527
Bt.5366.1.S1_at	0.0995	282006	PROS1	protein S (alpha)	48894	NM_174438.1	NM_174438
Bt.6816.1.S1_at	0.0995	337871	DICER1	dicer 1, ribonuclease type III	45343	NM_203359.1	NM_203359
Bt.21384.1.A1_at	0.0999	512750	UBE3B	Ubiquitin protein ligase E3B	76201	CB464835	XM_867990
Age
Bt.1035.1.S1_a_at	0.0835	338062	FCGRT	Fc fragment of IgG, receptor, transporter, alpha	1035	BG948848	NM_176657
Bt.10797.2.S1_a_at	0.0943	615093	LOC615093	hypothetical LOC615093	10797	CK954950	XM_866800
Bt.11492.1.A1_at	0.0835	538561	LOC538561	similar to meningioma expressed antigen 5 (hyaluronidase)	---	CK973771	XR_027849
Bt.11527.1.A1_at	0.0943	783489	LOC783489	similar to TRDV2S1	---	CB419749	XM_001252084
Bt.1178.1.S1_a_at	0.0943	431787 528735 786100	S100a1	S100 calcium binding protein A1	87250	CK770139	NM_001099042 /// XM_001253724 /// XM_001253744
Bt.12327.1.S1_at	0.0835	506790	TXNIP	thioredoxin interacting protein	12327	CK849102	NM_001101875
Bt.12435.2.S1_at	0.0835	533842	OBFC2B	oligonucleotide/oligosaccharide-binding fold containing 2B	12435	BE756486	NM_001101151
Bt.13306.1.S1_at	0.097	CK948835	---	---	13306	CK948835	---
Bt.13306.2.S1_at	0.0835	CF930909	---	---	13306	CF930909	---
Bt.13330.1.S1_at	0.0835	507367	PDK4	pyruvate dehydrogenase kinase, isozyme 4	23505	AW425306	NM_001101883
Bt.13521.2.S1_at	0.096	AW669942	---	---	91491	AW669942	---
Bt.136.1.S1_at	0.0943	281563	UCP3	uncoupling protein 3 (mitochondrial, proton carrier)	136	NM_174210.1	NM_174210
Bt.13986.1.S1_at	0.096	404110	ZFAND5	zinc finger, AN1-type domain 5	3717	CK769971	NM_001101045
Bt.14223.3.S1_at	0.0963	507781	NEDD4	Neural precursor cell expressed, developmentally down-regulated 4	79514	CB419023	XM_584456 /// XM_878522
Bt.1537.1.S1_at	0.0835	504499	NDRG1	N-myc downstream regulated 1	1537	CB421539	NM_001035009
Bt.15461.1.A1_at	0.0835	BP108864	---	---	---	BP108864	---
Bt.1560.1.S1_at	0.0996	538967	CDC42EP3	CDC42 effector protein (Rho GTPase binding) 3	1560	CK847693	NM_001046444
Bt.15888.1.A1_at	0.0835	534325	CUL3	cullin 3	64031	CB168066	XM_614056
Bt.15972.1.S1_at	0.0835	281193	GJA1	gap junction protein, alpha 1, 43kDa	15972	NM_174068.1	NM_174068
Bt.16004.1.A1_at	0.0943	281339	MYH8	myosin, heavy chain 8, skeletal muscle, perinatal	91149	AB090156.1	XM_865879
Bt.16520.1.A1_at	0.0943	789884	LOC789884	similar to carboxylesterase	16520	CB468474	XM_001256507
Bt.16917.1.S1_at	0.0943	783217	MLXIP	MLX interacting protein	16917	CK956580	XM_001251579
Bt.17530.1.A1_at	0.097	CB430626	---	---	1783	CB430626	---
Bt.17963.1.A1_at	0.0943	517345	ARL1	ADP-ribosylation factor-like 1	74187	CB537961	NM_001046229
Bt.18220.1.A1_at	0.0943	509840	CCDC112	coiled-coil domain containing 112	18220	CB460407	XM_586889
Bt.18309.1.A1_at	0.0835	521004	SLC39A10	solute carrier family 39 (zinc transporter), member 10	22651	CB442649	XM_599261
Bt.18958.1.S1_at	0.0835	613810	PCTK1	PCTAIRE protein kinase 1	18958	BE758142	NM_001101226
Bt.18973.1.S1_a_at	0.0943	506184	HEXDC	hexosaminidase (glycosyl hydrolase family 20, catalytic domain) containing	62451	CK773715	XM_001790615
Bt.19338.1.S1_at	0.097	790072	PVRL3	poliovirus receptor-related 3	43545	CK769267	XM_001256647
Bt.19774.1.A1_at	0.0835	532571	WWC2	WW and C2 domain containing 2	11858	CK952701	XM_611687
Bt.20035.2.A1_at	0.0943	538485	CXXC5	CXXC finger 5	9593	AW325466	NM_001038176
Bt.20145.1.S1_at	0.0835	523609	PRELID1	PRELI domain containing 1	20145	CK770335	NM_001038138
Bt.20216.3.S1_a_at	0.0943	613376	RPIA	ribose 5-phosphate isomerase A	20216	CK847979	NM_001035433
Bt.20240.1.S1_at	0.0963	539603	SASH1	SAM and SH3 domain containing 1	45311	CK940837	XM_588302
Bt.20286.1.S1_at	0.0982	100124505	PDE4B	phosphodiesterase 4B, cAMP-specific	53071	CB439779	NM_001102546
Bt.20487.1.S1_at	0.0961	508216	MRPL28	mitochondrial ribosomal protein L28	20487	CB166186	NM_001045996
Bt.20522.1.S1_at	0.0943	CK770939	---	---	96711	CK770939	---
Bt.20613.2.A1_at	0.0922	506231	BCAR3	breast cancer anti-estrogen resistance 3	20613	CK770175	NM_001024483
Bt.2070.2.A1_at	0.0835	541175	DUSP10	dual specificity phosphatase 10	2070	AV593991	NM_001034725
Bt.2070.3.S1_at	0.0943	541175	DUSP10	dual specificity phosphatase 10	2070	AW652581	NM_001034725
Bt.20910.1.S1_at	0.0835	CK773761	---	---	61058	CK773761	---
Bt.21048.1.S1_at	0.0943	CB451766	---	---	64759	CB451766	---
Bt.21125.2.S1_at	0.0961	506935	CCDC32	coiled-coil domain containing 32	55928	BI681607	NM_001075286
Bt.21372.2.S1_at	0.0835	513054	WHSC1L1	Wolf-Hirschhorn syndrome candidate 1-like 1	88726	BE485980	NM_001075595
Bt.21738.1.A1_at	0.0835	CB451615	---	---	21461	CB451615	---
Bt.21962.1.S1_at	0.0835	615376	EPDR1	ependymin related protein 1 (zebrafish)	21962	CB455803	NM_001102288
Bt.22136.1.S1_at	0.0943	100139246	LOC100139246	similar to FYVE and coiled-coil domain containing 1	21979	CB165701	XM_001790527
Bt.22167.2.A1_at	0.0943	541113	LRRC2	leucine rich repeat containing 2	22167	CB420345	NM_001080311
Bt.22176.1.A1_at	0.0835	CK771363	---	---	97160	CK771363	---
Bt.22651.1.A1_at	0.0835	521004	SLC39A10	Solute carrier family 39 (zinc transporter), member 10	22651	CB430757	XM_599261
Bt.22865.1.S2_at	0.0961	505638	TAF6	TAF6 RNA polymerase II, TATA box binding protein (TBP)-associated factor, 80kDa	13917	CK969094	NM_001015525
Bt.23173.1.S1_at	0.0943	506990	C13H20orf149	chromosome 20 open reading frame 149 ortholog	49309	CK953403	NM_001075294
Bt.23176.2.S1_a_at	0.096	281240	IGF2	insulin-like growth factor 2 (somatomedin A)	30727	AW657568	NM_174087
Bt.23225.1.S1_at	0.0835	CK847417	---	---	64980	CK847417	---
Bt.23396.2.S1_a_at	0.0943	507834	LOC507834	similar to Steroid hormone receptor ERR1 (Estrogen-related receptor, alpha) (ERR-alpha) (Estrogen receptor-like 1) (Nuclear receptor subfamily 3 group B member 1)	---	CK833811	XM_001790466
Bt.23396.2.S1_at	0.0835	507834	LOC507834	similar to Steroid hormone receptor ERR1 (Estrogen-related receptor, alpha) (ERR-alpha) (Estrogen receptor-like 1) (Nuclear receptor subfamily 3 group B member 1)	---	CK833811	XM_001790466
Bt.23627.1.S1_at	0.097	100125221	UBAP2L	ubiquitin associated protein 2-like	48769	CK967698	NM_001103107
Bt.23658.1.A1_at	0.0943	510538	ASF1B	ASF1 anti-silencing function 1 homolog B (S. cerevisiae)	23658	CK775334	NM_001075453
Bt.24096.1.A1_at	0.0943	BP105260	---	---	24096	BP105260	---
Bt.24625.1.S1_at	0.0963	618793	FOXO4	forkhead box O4	24625	CK777083	NM_001101277
Bt.24873.1.S1_at	0.0943	519864	MLLT10	Myeloid/lymphoid or mixed-lineage leukemia (trithorax homolog, Drosophila); translocated to, 10	38559	CK974922	XM_598095
Bt.2520.1.S1_at	0.0943	523846	SPOCK2	sparc/osteonectin, cwcv and kazal-like domains proteoglycan (testican) 2	2520	CB460448	NM_001101115
Bt.25398.1.A1_at	0.0943	539047	CYP26A1	cytochrome P450, family 26, subfamily A, polypeptide 1	9699	CK769455	XM_584484 /// XM_874268
Bt.26538.1.S1_at	0.097	509420	LOC509420	similar to chromosome 9 open reading frame 61	26538	BF606804	XM_586368
Bt.26718.1.S1_a_at	0.0943	506250	HCCS	holocytochrome c synthase	26718	CK974609	NM_001098886
Bt.26734.1.A1_at	0.0835	524464	LOC524464	similar to Semaphorin-6C precursor (Semaphorin-Y) (Sema Y)	---	CK775655	XR_028552
Bt.27293.1.S1_s_at	0.0961	789082	SF3A2	splicing factor 3a, subunit 2, 66kDa	27293	CK837710	NM_001099211
Bt.27904.1.A1_at	0.0963	CK846365	---	---	65419	CK846365	---
Bt.3312.1.S1_at	0.0835	785016	DUSP7	dual specificity phosphatase 7	3312	AF004361	NM_001101294
Bt.3999.1.S1_at	0.096	533357	NAGA	N-acetylgalactosaminidase, alpha-	57867	CK980929	NM_001046349
Bt.4086.1.S1_at	0.0835	338082	ATP6V1B2	ATPase, H+ transporting, lysosomal 56/58kDa, V1 subunit B2	4086	NM_176671.2	NM_001001146 /// NM_176671
Bt.4100.1.S1_at	0.0943	504587	C7H19ORF43	chromosome 19 open reading frame 43 ortholog	4100	CB461933	NM_001083371
Bt.4224.1.S1_at	0.0943	280715	AK1	adenylate kinase 1	4224	CK769471	NM_001013582
Bt.4347.1.S1_at	0.0943	532723	RAB11B	RAB11B, member RAS oncogene family	4347	AW484506	NM_001035391
Bt.4486.1.S1_a_at	0.0835	534550	LIN37	lin-37 homolog (C. elegans)	60928	CK775684	NM_001076026
Bt.4648.1.S1_at	0.0937	281762	FANCC	Fanconi anemia, complementation group C	4648	NM_174316.2	NM_174316
Bt.4670.1.S1_at	0.0835	539596	LOC539596	similar to Transforming growth factor-beta induced protein IG-H3 precursor (Beta IG-H3) (Kerato-epithelin) (RGD-containing collagen associated protein) (RGD-CAP)	46833	CK774445	XR_028016
Bt.4818.1.S1_at	0.0835	768028	BEX2	brain expressed X-linked 2	4818	CK977867	NM_001077087
Bt.4867.2.S1_at	0.0835	317655	MYH10	myosin, heavy chain 10, non-muscle	4057	AV592641	NM_174834
Bt.4895.1.S1_at	0.0835	615414	CCND2	cyclin D2	4895	AV612120	NM_001076372
Bt.4983.1.S1_at	0.097	514335	ES1	es1 protein	59485	CB166394	NM_001034463
Bt.5070.1.S1_at	0.0835	444874	UBC	ubiquitin C	5070	M62428.1	XM_874550
Bt.5070.1.S1_x_at	0.0943	444874	UBC	ubiquitin C	5070	M62428.1	XM_874550
Bt.5141.1.S2_at	0.0835	281781	B4GALT1	UDP-Gal:betaGlcNAc beta 1,4- galactosyltransferase, polypeptide 1	5141	CK946818	NM_177512
Bt.5154.1.S1_at	0.0963	281825 282254	HSPA1A HSPA1B	heat shock 70kDa protein 1A /// heat shock 70kDa protein 1B	49659	NM_174550.1	NM_174550 /// NM_203322
Bt.5348.1.S1_at	0.0835	100126192	H19	H19, imprinted maternally expressed untranslated mRNA	62950	AV601026	NR_003958
Bt.5608.1.A1_at	0.0943	512222	PDE4A	phosphodiesterase 4A, cAMP-specific (phosphodiesterase E2 dunce homolog, Drosophila)	52236	AV595551	NM_001101081
Bt.5657.2.S1_at	0.0835	510007	MGC133577	Hypothetical gene supported by BC055092; BC062221	100801	BF040788	NM_001110068
Bt.654.1.A1_at	0.0835	506325	ZMYND11	zinc finger, MYND domain containing 11	36337	CB461305	NM_001045940
Bt.6642.1.S1_a_at	0.0835	CB424184	---	---	6642	CB424184	---
Bt.6642.1.S1_at	0.0943	CB424184	---	---	6642	CB424184	---
Bt.6642.2.S1_at	0.096	CK959451	---	---	6642	CK959451	---
Bt.6774.1.S1_at	0.0962	408001	MAP1LC3B	microtubule-associated protein 1 light chain 3 beta	64566	CB169021	NM_001001169
Bt.68.1.S1_at	0.0943	327690	NDUFB1	NADH dehydrogenase (ubiquinone) 1 beta subcomplex, 1, 7kDa	62532	NM_175809.1	NM_175809
Bt.7034.1.S1_at	0.0835	780788	ITGB1BP3	integrin beta 1 binding protein 3	---	CK847787	NM_001079643
Bt.7325.1.S1_at	0.0835	538553	BAT2	HLA-B associated transcript 2	7325	BM251558	XM_001250446 /// XM_581077
Bt.7394.1.A1_at	0.096	615191	PTPLA	protein tyrosine phosphatase-like (proline instead of catalytic arginine), member A	23355	BF046141	XM_866930
Bt.742.1.S2_at	0.0835	282691	HMGB1	high-mobility group box 1	49650	BP107600	NM_176612
Bt.892.1.S1_at	0.0962	540225	COX7A2L	cytochrome c oxidase subunit VIIa polypeptide 2 like	49046	CK775109	NM_001034695
Bt.9054.1.A1_at	0.0835	514832	PEX5	peroxisomal biogenesis factor 5	10901	BM252072	NM_001046183
Bt.9139.1.A1_at	0.096	616332	LOC616332	hypothetical LOC616332	9139	CB439719	NM_001101255
Bt.9155.2.A1_at	0.0963	506600	SCYL3	SCY1-like 3 (S. cerevisiae)	64722	CB533230	XM_001787899
Bt.9190.1.S1_at	0.0835	783020	SULT1C2	Sulfotransferase family, cytosolic, 1C, member 2	86259	BM251629	NM_001080919
Bt.9848.1.A1_a_at	0.0835	CK772057	---	---	60505	CK772057	---
Bt.9947.1.S1_at	0.0943	615361	SNN	stannin	102616	CB459802	NM_001113722 /// XM_001790571
Bt.9974.1.S1_a_at	0.0943	282170	CCL3	chemokine (C-C motif) ligand 3	9974	NM_174511.2	NM_174511
