# Supplementary material for: Effect of DLK1 and RTL1 but Not MEG3 or MEG8 on Muscle Gene Expression in Callipyge Lambs
Source: PLoS One. 2009 Oct 9;4(10):e7399. doi: 10.1371/journal.pone.0007399 (PMC2756960; doi:10.1371/journal.pone.0007399)
Supplement: Table S8 — Quantitative PCR primer sequences, amplification conditions, and sequence identities (0.13 MB DOC) [file pone.0007399.s008.doc]

| *Gene* | Primer Sequence | Anneal Temp | Capt. Temp | Prod. Size | Representative Public ID | Identity %2 |
| --- | --- | --- | --- | --- | --- | --- |
| *APOD* | F5’-TCTTGCTTTGCTTTTCCCCTATACC-3’  R5’-AGCTTGCCTTGGGTTCTTCTCC-3’ | 55˚C | 80˚C | 128 bp | [BC109863, DQ239921](http://www.ncbi.nlm.nih.gov/entrez/viewer.fcgi?db=nucleotide&val=81674720) | 97.2% |
| *ARHGAP18* | F5’-TATCAACTCAACCCCAATG-3’  R5’-TAATCTGGCAGCAGCAC-3’ | 48˚C | 80˚C | 221 bp | [XR_027470](http://www.ncbi.nlm.nih.gov/entrez/query.fcgi?cmd=Search&db=Nucleotide&term=XR_027470) | NA3 |
| *AKR1C4* | F5’-GGATCCCAACTATCATCAGA-3’  R5’-GGTTTGCTTGTGCTTTTT-3’ | 48˚C | 80˚C | 96 bp | [XM_581077](http://www.ncbi.nlm.nih.gov/entrez/viewer.fcgi?db=nucleotide&val=76650908) | 95.9% |
| *ATF4* | F5’-AGAGAGGAGTCAGGGCTCATA-3’  R5’-TGTCTTCCACTCCAGATCATTC-3’ | 52˚C | 51˚C | 178 bp | [NM_001034342](http://www.ncbi.nlm.nih.gov/entrez/viewer.fcgi?db=nucleotide&val=77735636) | 91.0% |
| *BHLHB3* | F5’-ATGTAAGGGGTGAGACACAACAGT-3’  R5’-CAAACAGTAGCAACAGCAGCAG-3’ | 54˚C | 80˚C | 99 bp | [XM_865112](http://www.ncbi.nlm.nih.gov/entrez/viewer.fcgi?db=nucleotide&val=76619292) | 99.5% |
| *CABC1* | F5’-GAGCTGAGCAGTGCCAACAAGTA-3’  R5’-TAGGAGGCGGCAGTTCTCTG-3’ | 57˚C | 84˚C | 120 bp | [NM_001046419](http://www.ncbi.nlm.nih.gov/entrez/query.fcgi?cmd=Search&db=Nucleotide&term=NM_001046419) | 95.0% |
| *CAST* | F5’- AGAGACCCACCAGGACGTG-3’  R5’- CAGGGGCTCTAGGCTAACA-3’ | 54˚C | 83˚C | 197 bp | NM_001030320 | 92.0% |
| *CDO1* | F5’- AAGGTCCAGCGAAGTTCC-3’  R5’- CAGGGGCTCTAGGCTAACA-3’ | 52˚C | 79˚C | 147 bp | NM_001034465 | 95.2% |
| CB439344 | F5’-CACTGAAAAGCACGTGCCTTCT-3’  R5’-GATTTAGCATCTGCCATGGACAA-3’ | 54˚C | 76˚C | 162 bp | [CB439344](http://www.ncbi.nlm.nih.gov/entrez/viewer.fcgi?db=nucleotide&val=29224258) | 90.4% |
| CB535183 | F5’-GGGAGGAGAGGTGAGTCA-3’  R5’-CTATTACAGGATTTGGGTGGTA-3’ | 50˚C | 78˚C | 157 bp | [CB535183](http://www.ncbi.nlm.nih.gov/entrez/query.fcgi?cmd=Search&db=Nucleotide&term=CB535183) | 96.2% |
| *DLK1* | F 5’-CCCGTCCTCTTGCTCCTGCT-3’ R 5’-GGCTGGCACCTGCACACACT-3’ | 58˚C | 82˚C | 116 bp | NM_174037 | NA4 |
| *DTNA* | F5’-GGTTACTTCAAATGGCGTCAA-3’  R5’-GGATTCCGCACAAACAACTC-3’ | 52˚C | 77˚C | 164 bp | [CK945807](http://www.ncbi.nlm.nih.gov/entrez/query.fcgi?cmd=Search&db=Nucleotide&term=CK945807) | NA3 |
| *ECH1* | F5’-CAAGAGACCTTCAGCGTCATC-3’  R5’-ATCTGCCGCCAAACCTAC-3’ | 53˚C | 85˚C | 168 bp | [XM_866888](http://www.ncbi.nlm.nih.gov/entrez/viewer.fcgi?db=nuccore&val=119910471) | NA3 |
| *EIF4A3* | F5’- CCGCATCCTCAGAGACAT-3’  F5’- ATAGATGAAGAGGCTCCAGTGA-3’ | 52˚C | 80˚C | 110 bp | NM_001046188 | 100% |
| *FCGRT* | F5’-TCGTCATCGGCTTATTCCT-3’  R5’-GATGATCGGCAGTTGCTG-3’ | 52˚C | 85˚C | 195 bp | [NM_176657](http://www.ncbi.nlm.nih.gov/entrez/query.fcgi?cmd=Search&db=Nucleotide&term=NM_176657) | 97.4% |
| *HMGN2* | F5’-CACAGACTTGACTCCCCTAACC-3’  R5’-TTTGAAGGACGCCATCTCA-3’ | 52˚C | 82˚C | 127 bp | [XM_589617](http://www.ncbi.nlm.nih.gov/entrez/viewer.fcgi?db=nucleotide&val=76611236) | NA3 |
| *IDH2* | F5’-CTGGACGCGTGGCCTAGAACA-3’  R5’-TTGCTGAGGCCGTGGATGC-3’ | 59˚C | 86˚C | 150 bp | [NM_175790](http://www.ncbi.nlm.nih.gov/entrez/query.fcgi?cmd=Search&db=Nucleotide&term=NM_175790) | 96.0% |
| *KCNN3* | F5’-CGGGAAACGTGGCTAATCTACA-3’  R5’-GTGTTGGCTTGGTCACTCAGCT-3’ | 55˚C | 83˚C | 152 bp | [XM_868686](http://www.ncbi.nlm.nih.gov/entrez/viewer.fcgi?db=nucleotide&val=76612085) | 97.0% |
| LOC789894 | F5’-CTCAGACAGGCGGGAAGAT-3’  R5’-TTTGGGTTGTACCTTGGAAGC-3’ | 54˚C | 83˚C | 126 bp | [XM_001256515](http://www.ncbi.nlm.nih.gov/entrez/viewer.fcgi?db=nuccore&val=119910012) | 98.4% |
| *LPL* | F5’-TCACGTATGAAGCCCCACAT-3’  R5’-AAGGAGTGTTCCGGCACCA-3’ | 55˚C | 80˚C | 119 bp | [NM_001075120](http://www.ncbi.nlm.nih.gov/entrez/query.fcgi?cmd=Search&db=Nucleotide&term=NM_001075120) | 90.0% |
| *MAPK6* | F5’-TCAAAGTCAGTAAGCCGAGAA-3’  R5’-AACAGTCCTCCCCACCAC-3’ | 52˚C | 80˚C | 115 bp | [XM_605323](http://www.ncbi.nlm.nih.gov/entrez/viewer.fcgi?db=nucleotide&val=76663342) | 97.9% |
|  |  |  |  |  |  |  |
|  |  |  |  |  |  |  |
| *Gene* | Primer Sequence | Anneal Temp | Capt. Temp | Prod. Size | Representative Public ID | Identity %2 |
| *TXNIP* | F5’-ATGTTGCCATGAGAAACCAGAA-3’  R5’-TAAGGCGGAGAGTGACTGACC-3’ | 52˚C | 84˚C | 140 bp | NM_001101875 | 97.9% |
| *MLYCD* | F5’-CCGTGGTCGCCTTAGC-3’  R5’-TTGTGTAGATTCGCAAACCTT-3’ | 51˚C | 78˚C | 111 bp | [XM_864349](http://www.ncbi.nlm.nih.gov/entrez/viewer.fcgi?db=nuccore&id=119909819) | 80.5% |
| *MYL3* | F5’-CATAGTTGATGCAGCCGTTGGA-3’  R5’-TGTTGAGGGTCTGCGTGTCTTC-3’ | 56˚C | 83˚C | 158 bp | [NM_001034342](http://www.ncbi.nlm.nih.gov/entrez/viewer.fcgi?db=nucleotide&val=77735636) | NA4 |
| *NME4* | F5’-CACCTCGAGGGCCATGATAG-3’  R5’-TGGATGACATTCCTGCTGACG-3’ | 55˚C | 84˚C | 98 bp | [NM_001077906](http://www.ncbi.nlm.nih.gov/entrez/query.fcgi?cmd=Search&db=Nucleotide&term=NM_001077906) | NA3 |
| *PARK7* | F5’-CGAGTCCGCTGCTGTGA-3’  R5’-TGACTTCCGTTCATCATTTTGT-3’ | 51˚C | 82˚C | 165 bp | [NM_001015572](http://www.ncbi.nlm.nih.gov/entrez/viewer.fcgi?db=nucleotide&val=62751848) | 100% |
| *PDE4D* | F5’-TAAACAGTACAAAGGGGACACT-3’  R5’-CTGTAAGAGAGGCTAAGAAACC-3’ | 50˚C | 75˚C | 151 bp | [AF536980](http://www.ncbi.nlm.nih.gov/entrez/viewer.fcgi?db=nucleotide&val=22901891) | 70.9% |
| *PDLIM1* | F5’-AAGCCCTCAGGATTCAGAAGT-3’  R5’-GAACACGCCGACAATGC-3’ | 53˚C | 84˚C | 117 bp | [NM_001035455](http://www.ncbi.nlm.nih.gov/entrez/viewer.fcgi?db=nuccore&val=78369681) | 96.6% |
| *PDLIM7* | F5’-GGGAGCGCCTTAGCCTTAG-3’  R5’-TGCTGGCATCTGGGACC-3’ | 56˚C | 86˚C | 213 bp | [NM_001017947](http://www.ncbi.nlm.nih.gov/entrez/viewer.fcgi?db=nuccore&id=62988301) | NA3 |
| *PHKA* | F5’-ATATTGCCAATGACTTGTTTCT-3’  R5’-TGCTTTGGAGAGGTAGGTC-3’ | 49˚C | 82˚C | 152 bp | [XM_609143.](http://www.ncbi.nlm.nih.gov/entrez/viewer.fcgi?db=nucleotide&val=76659298) | 100% |
| *PFKFB1* | F5’-CCTGGCCTACTTTCTGGACAA-3’  R5’-TTCTCAGGTTTCTCCCGATGT-3’ | 54˚C | 83˚C | 159 bp | [NM_174572](http://www.ncbi.nlm.nih.gov/entrez/viewer.fcgi?db=nuccore&val=94400820) | 97.5% |
| *PGM1* | F5’-TGGTTCTCGCATCATCTTTC-3’  R5’-ACCTTCAGGGCAATGGA-3’ | 51˚C | 84˚C | 150 bp | [NM_001076903](http://www.ncbi.nlm.nih.gov/entrez/query.fcgi?cmd=Search&db=Nucleotide&term=NM_001076903) | NA3 |
| *PKM2* | F5’-CTTGGGTCGGGTAGTTCA-3’  R5’-AATCGGGTATACAAAGGAAGG-3’ | 50˚C | 85˚C | 147 bp | [XM_590109](http://www.ncbi.nlm.nih.gov/entrez/viewer.fcgi?db=nuccore&id=119902009) | 93.2% |
| *PRPF3* | F5’- AACAGTGCCCTACAGAGAACA-3’  R5’- AAGGTAAGAGGGGAGAGGAAG-3’ | 53˚C | 83˚C | 143 bp | NM_001046051 | 97.9% |
| *ROCK2* | F5’-ACTGCGTCTTTAAGAAGTG-3’  R5’-ATTATGGCTTTATACAAGTGC-3’ | 47˚C | 77˚C | 195 bp | [NM_174452](http://www.ncbi.nlm.nih.gov/entrez/viewer.fcgi?db=nuccore&id=31341963) | 98.4% |
| *RPLP0* | F 5’-CAACCCTGAAGTGCTTGACAT-3’  R 5’-AGGCAGATGGATGGATCAGCCA-3’ | 50˚C | 84˚C | 208 bp | NM_001012682 | 100% |
| *SCL22A3* | F5’-TGAACAAAGGGAGAATGTAGGTA-3’  R5’-GCCTTAAAGCACATCAGCAT-3’ | 52˚C | 77˚C | 101 bp | CK968244 | 93.1% |
| *SEPHS2* | F5’- TGCACATTCCAAGGCCAGAA-3’  R5’- TCAATTAATCCCGTGCCAAGAAA-3’ | 52˚C | 81˚C | 167 bp | XR_028325 | 94.1% |
| *SP140* | F5’-GGCAAGCTGCAGTTTCACTCA-3’  R5’-GAATGCGGTCGGGTGCTAC-3’ | 57˚C | 81˚C | 161 bp | [BP103828](http://www.ncbi.nlm.nih.gov/entrez/viewer.fcgi?db=nucleotide&val=28306116) | 93.8% |
| *TCEA3* | F5’-CCTCCGTCTGCCTCTTG-3’  R5’-GTAATCATCATCCGCCTTCAG-3’ | 52˚C | 84˚C | 101 bp | [NM_001046360](http://www.ncbi.nlm.nih.gov/entrez/viewer.fcgi?db=nuccore&id=114052231) | 100% |
| *TEX2* | F5’-AAGTCATGTTCAGGCAAGGT-3’  R5’-AAGCTGCATTCAACATCAGA-3’ | 51˚C | 79˚C | 111 bp | NM_001101970 | 98.2% |
|  |  |  |  |  |  |  |
|  |  |  |  |  |  |  |
| *Gene* | Primer Sequence | Anneal Temp | Capt. Temp | Prod. Size | Representative Public ID | Identity %2 |
| *TRAF3IP3* | F5’-GCTGCAGGCCAGGATTGAAT-3’  R5’-TTGGTCACCAGGGCAAGTTTC-3’ | 56˚C | 83˚C | 117 bp | [BC119991](http://www.ncbi.nlm.nih.gov/entrez/viewer.fcgi?db=nuccore&val=111307011) | 98.3% |
| *TTYH1* | F5’-TTGCGTGGCCTGTGTGAAGA-3’  R5’-ACGAAGCGCTTGGATTCCTGA-3’ | 57˚C | 86˚C | 191 bp | [NM_001077015](http://www.ncbi.nlm.nih.gov/entrez/query.fcgi?cmd=Search&db=Nucleotide&term=NM_001077015) | 97.4% |
| *UCHL1* | F5’-CAGCTGTTCTCCTTCGGTTCT-3’  R5’-GAATGCTTCGCCATCACA3’ | 52˚C | 84˚C | 117 bp | [NM_001046172](http://www.ncbi.nlm.nih.gov/entrez/viewer.fcgi?db=nuccore&val=114051422) | NA3 |

1Additional primers and quantitative PCR conditions for the callipyge region of ovine chromosome 18 sequences and microarray target sequences have been published [18, 20, 47, 48].

2Percent similar identity of cloned sheep cDNA amplicon compared to bovine cDNA sequence.

3Sheep amplicon not sequenced due to lack of significance for quantitative PCR analysis.

4Designed directly from sheep sequence.
